# Supplementary material
Source: MDPI journal article supplement (https://www.mdpi.com/2076-3417/13/16/9474)
Supplement: s1 [file s1]

# Effects of Processing Conditions on the Properties of Porous Diatomite Granules Prepared by Sodium Alginate Gelation

Maria Dolores Sosa Lucio <sup>1,2</sup>, Eun-Ji Oh <sup>1</sup>, Jang-Hoon Ha <sup>1,\*</sup>, Jongman Lee <sup>1,2</sup>, Hong-Joo Lee <sup>1</sup> and In-Hyuck Song <sup>1,2</sup>

<sup>1</sup> Ceramic Materials Division, Korea Institute of Materials Science (KIMS), 797 Changwon-daero, Seongsan-gu, Changwon-si 51508, Republic of Korea; mariasosa@kims.re.kr (M.D.S.L.); hey22@kims.re.kr (E.-J.O.); jmlee@kims.re.kr (J.L.); hjlee@kims.re.kr (H.-J.L.); sih1654@kims.re.kr (I.-H.S.)

<sup>2</sup> Department of Advanced Materials Engineering, University of Science and Technology (UST), 217 Gajeong-ro, Yuseong-gu, Daejeon 34113, Republic of Korea

\* Correspondence: hjhoon@kims.re.kr

## Supplementary Materials

A detailed summary of the processing conditions and composition of diatomite slurry batches is depicted in Figure S1.

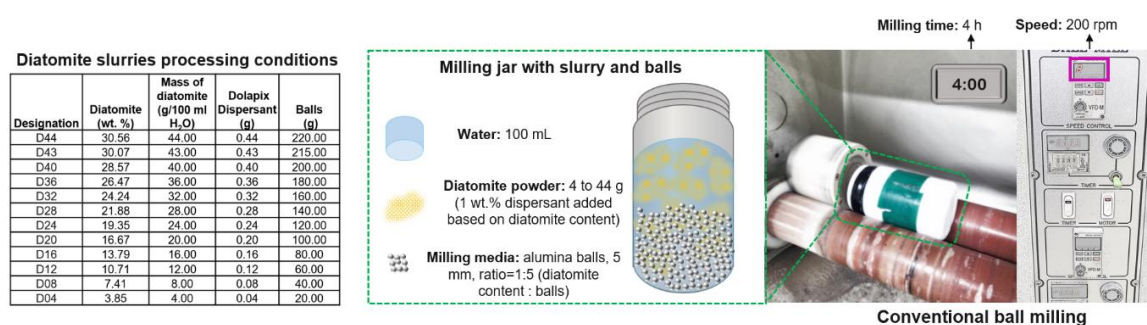

**Figure S1.** Scheme illustrating the ball-milling conditions and the processed diatomite slurries used to prepare the diatomite/sodium alginate dispersions and, subsequently, the porous diatomite granules.

Additional diatomite-sodium alginate granules obtained at each step of the processing route, including aging in a 10 wt.% CaCl<sub>2</sub> bath followed by cleaning with DI water (a), drying overnight at 80 °C (b), and heat treatment at 1200 °C for 1 h in air (c) are presented in Figure S2 and Figure S3

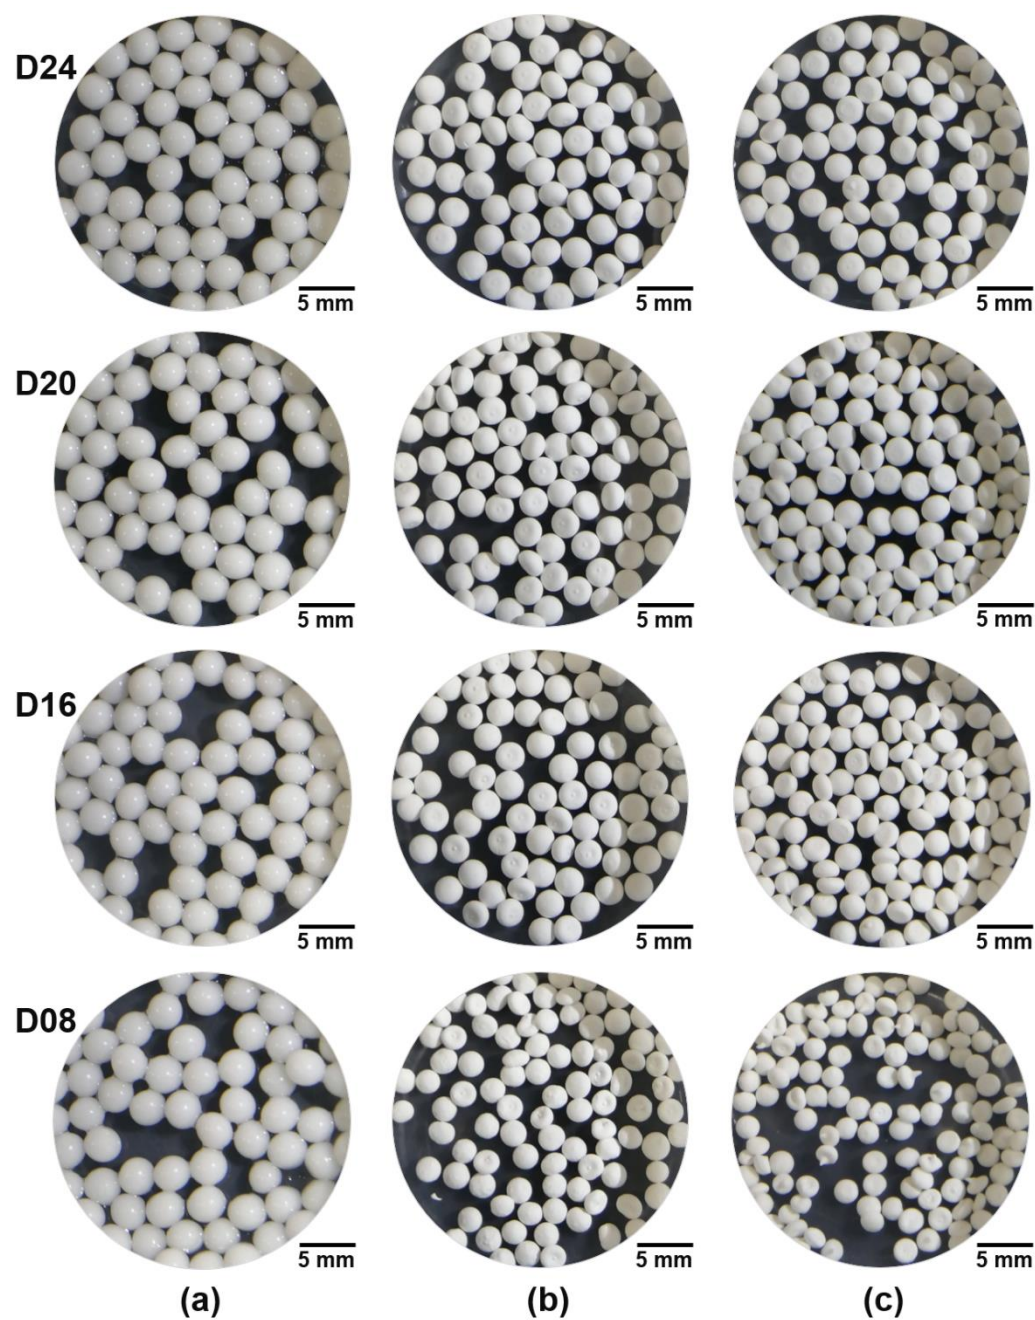

**Figure S2.** Representative porous diatomite granules (D08-D24) obtained after each step in the processing route: (a) aging ( $\text{CaCl}_2$  bath) and cleaning (DI water), (b) drying ( $80^\circ\text{C}$ , overnight), and (c) a heat treatment at  $1200^\circ\text{C}$  for 1 h in air.

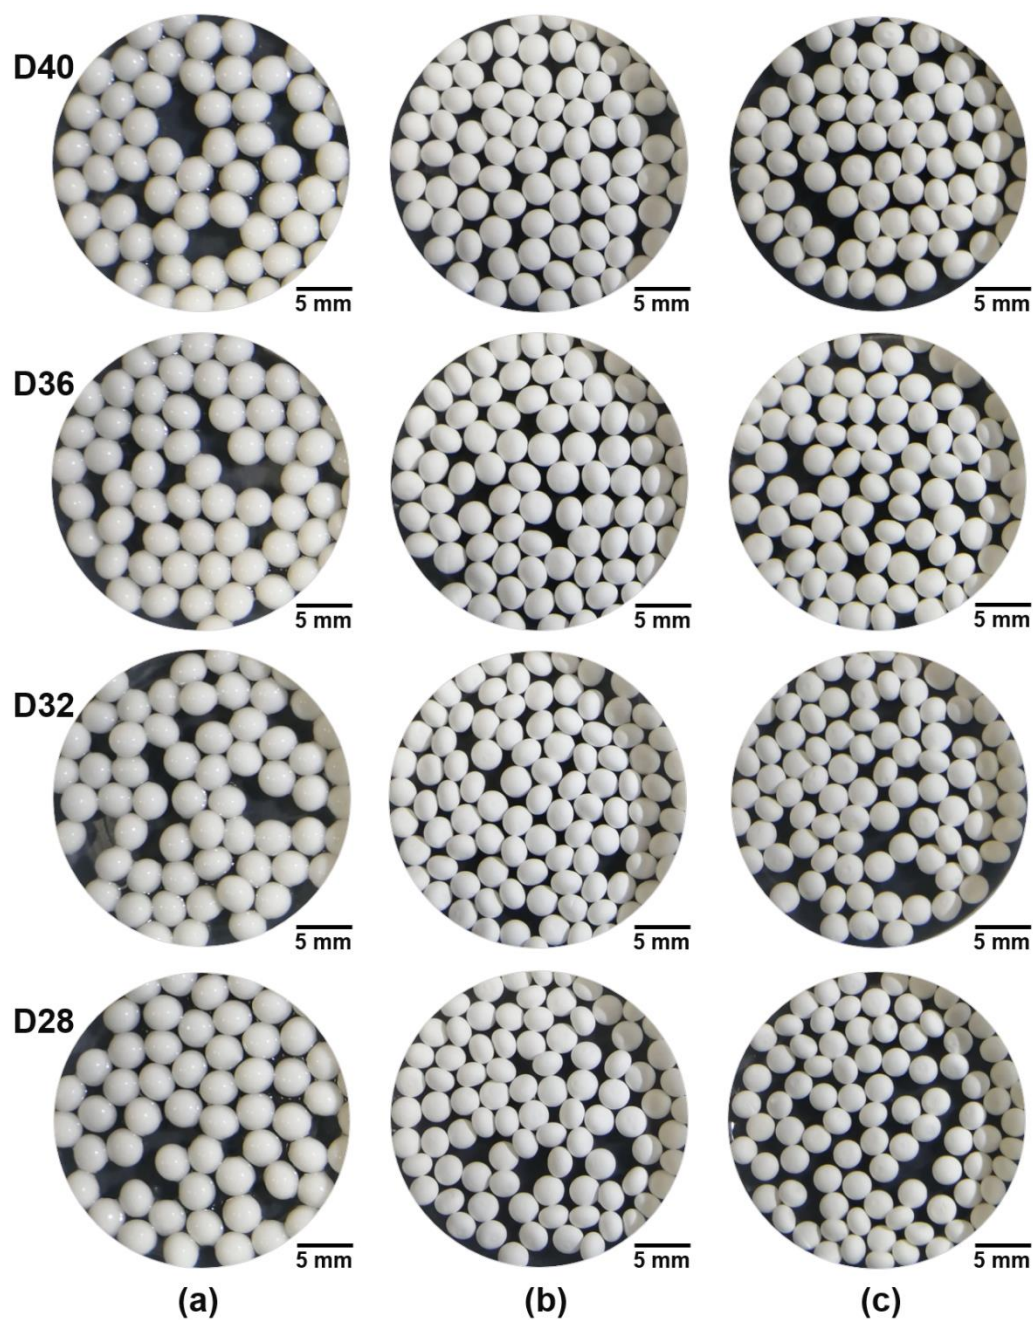

**Figure S3.** Representative porous diatomite granules (D28-D40) obtained after each step in the processing route: (a) aging ( $\text{CaCl}_2$  bath) and cleaning (DI water), (b) drying ( $80^\circ\text{C}$ , overnight), and (c) a heat treatment at  $1200^\circ\text{C}$  for 1 h in air.
